# Supplementary material
Source: publisher figshare collection journal article supplement (https://acs.figshare.com/ndownloader/files/5736081)
Supplement: Supplementary file 1 [file 5736081]

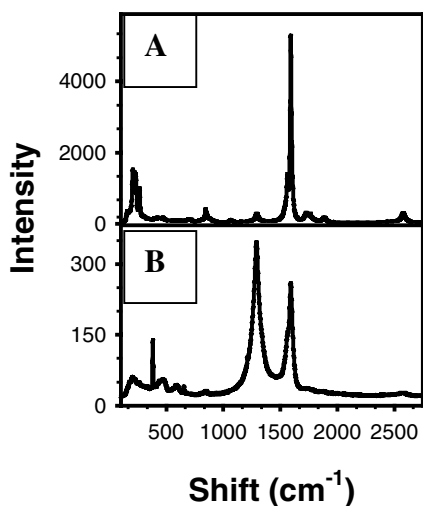

**Figure A.** Raman spectra (780.6 nm excitation) of (A) pristine SWNTs, and (B) the product of the diazonium salt of 4-chloroaniline and SWNTs in a ball-miller. Spectrum B displays an increased disorder mode compared to pristine SWNTs.

NMR analysis was attempted on the **3** and **4**. However, as is typical in the NMR analysis of SWNTs, we were unable to obtain meaningful <sup>1</sup>H NMR signals (500 MHz, inverse probe) due to any one or more of the following reasons: low concentration, the exceedingly short T<sub>2</sub> relaxation times for these large molecules with their slow tumbling rates, and traces of Fe impurities. CP-MAS NMR (200 MHz wide bore) was equally uninformative showing signals that were too broad to meaningfully interpret.

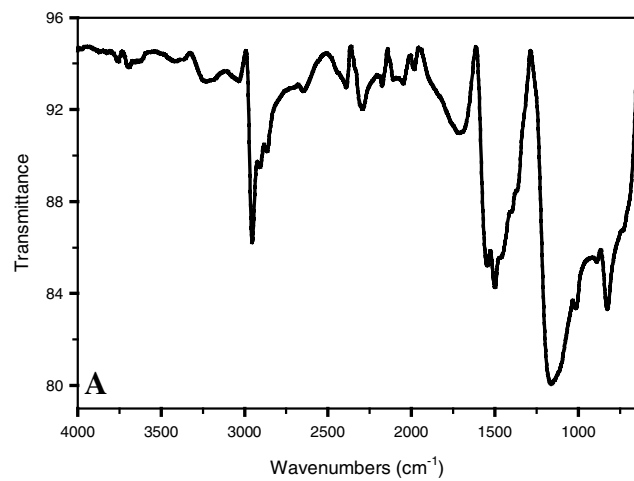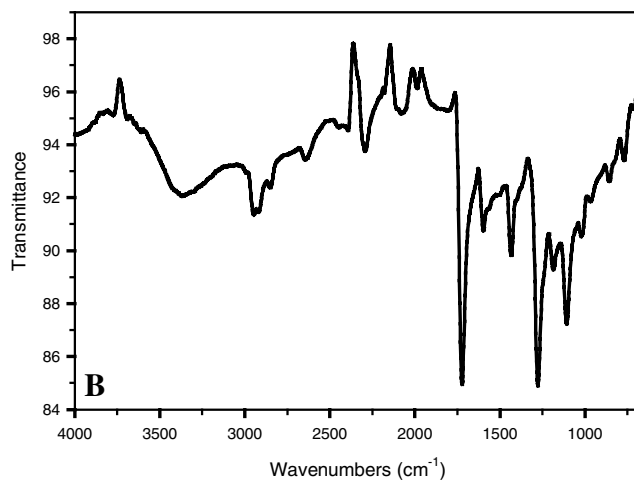

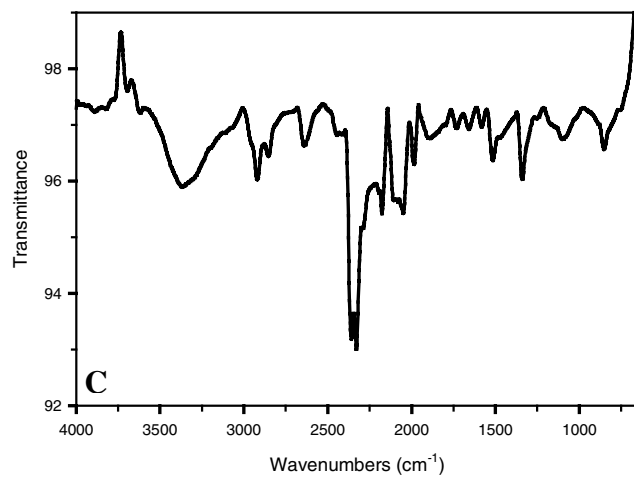

Figure B. ATR-IR spectra of (A) *tert*-butyl-substituted product **3**, (B) aryl ester **4**, and (C) aryl nitro **5**.
